# Supplementary material for: An Analysis of Plan Robustness for Esophageal Tumors: Comparing Volumetric Modulated Arc Therapy Plans and Spot Scanning Proton Planning
Source: PubMed Central journal article supplement (PMC4838670; doi:10.1016/j.ijrobp.2016.01.044), 2016-05-01
Supplement: mmc1.pdf [file mmc1.pdf]

Supplementary Table 1: Dose-volume metrics for nominal plans, patients are listed in order of increasing PTV<sub>50Gy</sub> size, where unsuccessful dose escalation using VMAT is highlighted.

| Patient No. | PTV <sub>50Gy</sub> volume (cm <sup>3</sup> ) | VMAT plan                               |                                           |                                          |                          |                 |                              |                |              | Proton plan                             |                                           |                                          |                          |                 |                              |                |              |
|-------------|-----------------------------------------------|-----------------------------------------|-------------------------------------------|------------------------------------------|--------------------------|-----------------|------------------------------|----------------|--------------|-----------------------------------------|-------------------------------------------|------------------------------------------|--------------------------|-----------------|------------------------------|----------------|--------------|
|             |                                               | PTV <sub>50Gy</sub> D <sub>95</sub> (%) | PTV <sub>62.5Gy</sub> D <sub>95</sub> (%) | CTV <sub>50Gy</sub> D <sub>98</sub> (Gy) | GTV D <sub>98</sub> (Gy) | Heart mean (Gy) | Cord 0.1cm <sup>3</sup> (Gy) | Lung Mean (Gy) | Lung V20 (%) | PTV <sub>50Gy</sub> D <sub>95</sub> (%) | PTV <sub>62.5Gy</sub> D <sub>95</sub> (%) | CTV <sub>50Gy</sub> D <sub>98</sub> (Gy) | GTV D <sub>98</sub> (Gy) | Heart mean (Gy) | Cord 0.1cm <sup>3</sup> (Gy) | Lung Mean (Gy) | Lung V20 (%) |
| 1           | 140.1                                         | 96.2                                    | 97.1                                      | 49.4                                     | 63.4                     | 19.4            | 25.4                         | 8.4            | 5.8          | 99.8                                    | 95.9                                      | 48.8                                     | 62.8                     | 10.5            | 1.7                          | 4.3            | 2.8          |
| 2           | 146.8                                         | 97.0                                    | 95.5                                      | 49.3                                     | 63.3                     | 16.0            | 21.5                         | 10.1           | 8.0          | 99.7                                    | 98.9                                      | 48.5                                     | 62.8                     | 10.0            | 0.0                          | 4.9            | 4.1          |
| 3           | 195.2                                         | 98.2                                    | 99.1                                      | 49.7                                     | 63.2                     | 20.2            | 31.1                         | 12.1           | 11.9         | 98.8                                    | 97.8                                      | 48.2                                     | 62.8                     | 12.8            | 23.7                         | 6.2            | 6.3          |
| 4           | 195.6                                         | 96.1                                    | 96.8                                      | 49.3                                     | 63.2                     | 19.8            | 33.3                         | 11.6           | 10.5         | 98.2                                    | 98.5                                      | 48.2                                     | 62.5                     | 11.9            | 28.8                         | 2.9            | 3.3          |
| 5           | 205.2                                         | 96.4                                    | 97.7                                      | 49.3                                     | 63.1                     | 22.2            | 33.9                         | 10.5           | 8.5          | 100.0                                   | 99.4                                      | 49.5                                     | 62.6                     | 13.4            | 26.6                         | 2.5            | 2.5          |
| 6           | 218.6                                         | 99.8                                    | 97.6                                      | 52.0                                     | 63.2                     | 14.4            | 32.5                         | 9.6            | 9.4          | 99.3                                    | 96.8                                      | 48.5                                     | 62.6                     | 8.6             | 23.9                         | 5.5            | 5.0          |
| 7           | 233.4                                         | 97.1                                    | 95.8                                      | 49.7                                     | 63.2                     | <b>25.6</b>     | 34.1                         | 12.3           | 15.6         | 99.8                                    | 97.5                                      | 48.5                                     | 62.5                     | 15.6            | 20.6                         | 6.2            | 4.0          |
| 8           | 239.0                                         | 98.9                                    | 96.5                                      | 50.4                                     | 62.9                     | 16.2            | 33.7                         | 12.7           | 14.8         | 99.7                                    | 96.8                                      | 48.7                                     | 62.6                     | 9.5             | 21.4                         | 7.2            | 6.7          |
| 9           | 297.7                                         | 96.9                                    | 96.9                                      | 49.6                                     | 63.0                     | 23.9            | 34.7                         | 13.3           | 18.1         | 100.0                                   | 98.6                                      | 49.9                                     | 62.5                     | 14.3            | 12.3                         | 7.5            | 8.6          |
| 10          | 301.1                                         | 96.8                                    | 95.5                                      | 49.6                                     | 63.0                     | 22.4            | 27.7                         | 13.2           | 14.1         | 99.2                                    | 99.4                                      | 48.3                                     | 62.5                     | 13.4            | 1.3                          | 6.3            | 6.0          |
| 11          | 311.7                                         | 99.9                                    | 99.6                                      | 49.1                                     | 63.0                     | <b>29.8</b>     | 33.2                         | 14.0           | 18.3         | 99.9                                    | 98.3                                      | 49.2                                     | 62.3                     | <b>25.3</b>     | 27.8                         | 6.0            | 9.4          |
| 12          | 329.8                                         | 99.7                                    | 99.9                                      | 52.4                                     | 63.0                     | 20.7            | 34.5                         | 16.7           | 22.5         | 97.9                                    | 97.5                                      | 48.4                                     | 62.4                     | 11.3            | 31.2                         | 8.5            | 11.1         |
| 13          | 356.1                                         | 96.9                                    | 95.7                                      | 49.2                                     | 62.9                     | 15.0            | 34.2                         | 13.9           | 15.6         | 99.1                                    | 96.6                                      | 49.2                                     | 62.6                     | 8.2             | 24.5                         | 7.0            | 7.2          |
| 14          | 374.9                                         | 98.2                                    | 95.9                                      | 49.7                                     | 62.8                     | 24.0            | 24.6                         | 13.6           | 12.9         | 99.9                                    | 95.9                                      | 49.1                                     | 62.6                     | 13.5            | 13.3                         | 5.1            | 5.3          |
| 15          | 405.2                                         | 97.6                                    | 97.3                                      | 49.8                                     | 63.0                     | 21.0            | 34.5                         | 16.2           | 22.7         | 99.9                                    | 97.2                                      | 48.8                                     | 62.6                     | 11.4            | 16.4                         | 8.2            | 9.4          |
| 16          | 408.8                                         | 95.8                                    | 95.3                                      | 49.4                                     | 62.9                     | 19.4            | 33.2                         | 17.5           | <b>28.8</b>  | 97.5                                    | 97.6                                      | 48.8                                     | 62.6                     | 12.7            | 39.3                         | 11.4           | 16.8         |
| 17          | 434.2                                         | 97.3                                    | 95.8                                      | 50.1                                     | 63.0                     | <b>25.5</b>     | 27.9                         | 13.7           | 15.7         | 98.6                                    | 95.8                                      | 48.7                                     | 62.5                     | 17.4            | 2.8                          | 6.5            | 5.8          |
| 18          | 443.1                                         | 97.1                                    | 96.5                                      | 49.7                                     | 63.0                     | 21.2            | 35.4                         | 14.7           | 17.2         | 98.9                                    | 96.4                                      | 48.7                                     | 62.6                     | 10.4            | 23.8                         | 6.3            | 6.6          |
| 19          | 453.6                                         | 96.4                                    | 99.7                                      | 49.2                                     | 62.7                     | 22.0            | 33.2                         | 14.9           | 20.2         | 99.8                                    | 99.8                                      | 49.1                                     | 62.5                     | 12.9            | 10.3                         | 7.4            | 8.5          |
| 20          | 544.9                                         | 98.8                                    | 98.3                                      | 50.3                                     | 62.6                     | 23.1            | 36.5                         | 16.0           | 21.3         | 99.9                                    | 97.9                                      | 48.8                                     | 62.4                     | 11.9            | 24.7                         | 8.6            | 10.0         |
| 21          | 590.8                                         | <b>92.4</b>                             | <b>92.5</b>                               | 49.6                                     | 62.9                     | <b>28.9</b>     | 35.4                         | 18.1           | <b>29.7</b>  | 99.8                                    | 98.4                                      | 49.4                                     | 62.4                     | 18.5            | 25.3                         | 11.4           | 17.1         |
