# Supplementary material for: An Analysis of Plan Robustness for Esophageal Tumors: Comparing Volumetric Modulated Arc Therapy Plans and Spot Scanning Proton Planning
Source: PubMed Central journal article supplement (PMC4838670; doi:10.1016/j.ijrobp.2016.01.044), 2016-05-01

Supplementary Figure Cord dose ( $0.1\text{cm}^3$ ) robustness for each patient for the nominal plans (circles), with perturbed plans median dose (squares) and maximum /minimum values (error bars). *Top*: VMAT set-up error; *middle*: SFO set-up error and *bottom*: SFO range error.

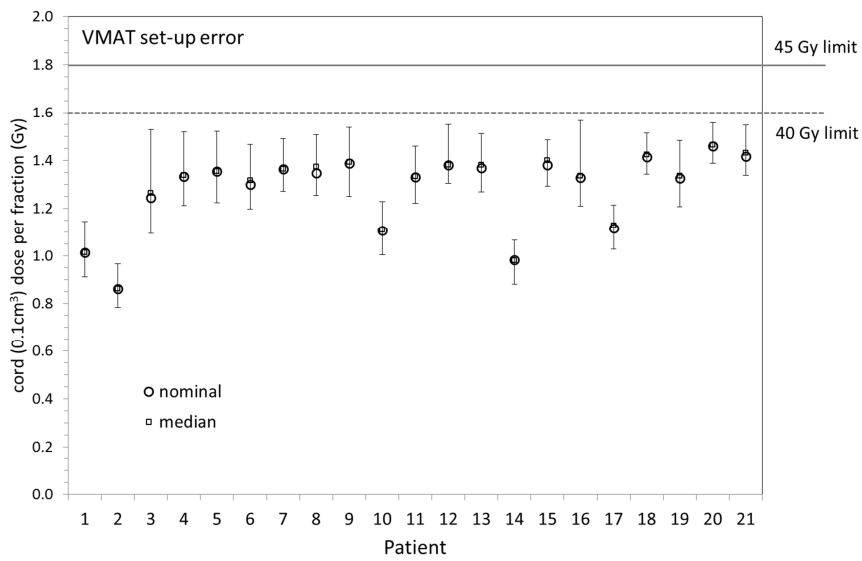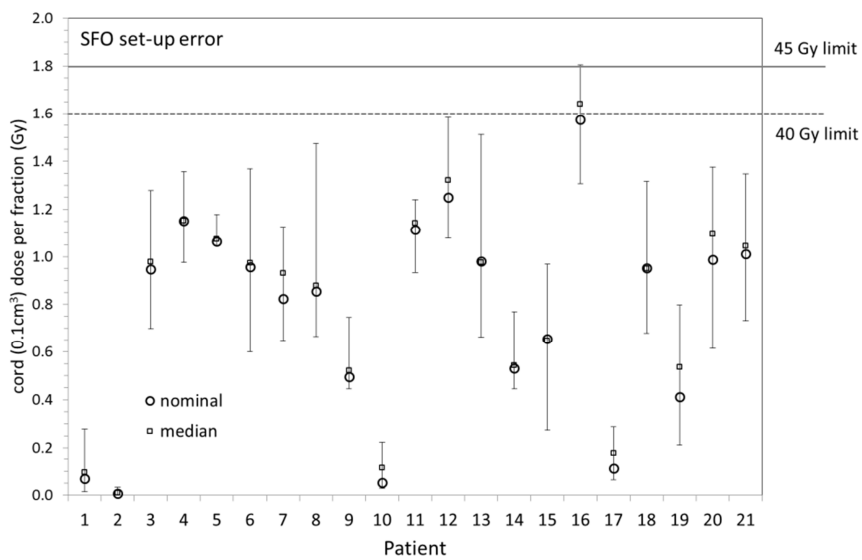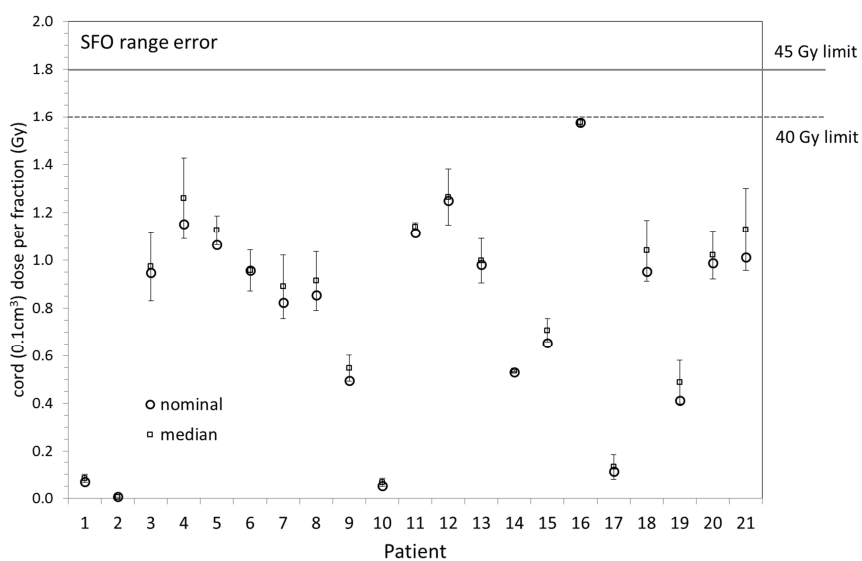

Supplement: mmc2.pdf [file mmc2.pdf]
